# Supplementary material
Source: publisher figshare collection journal article supplement (https://tandf.figshare.com/ndownloader/files/12558464)
Supplement: Supplementary file 1 [file 12558464]

Supplementary Table S1

| Human Genes | FORWARD Primer | REVERSE Primer |
| --- | --- | --- |
| TFEB | 5’-ACCTGTCCGAGACCTATGGG-3’ | 5’-CGTCCAGACGCATAATGTTGTC-3’ |
| RAB7A | 5’-GTGATGGTGGATGACAGGCTAG-3’ | 5’-AGTCTGCACCTCTGTAGAAGGC-3’ |
| RAB7B | 5’-ATATCTGGCGGGGTGATGTCCT-3’ | 5’-CTCTCTACACCAGCCTTGAGCT-3’ |
| ULK1 | 5’-GCAAGGACTCTTCCTGTGACAC-3’ | 5’-CCACTGCACATCAGGCTGTCTG-3’ |
| ULK2 | 5’-ACAGCAAAGGAATCATCCACAG-3’ | 5’-TGATGCGAATACCACTGACAC-3’ |
| BECN-1 | 5’-CCATGCAGGTGAGCTTCGT-3’ | 5’-GAATCTGCGAGAGACACCATC-3’ |
| ATG5 | 5’-GCAGATGGACAGTTGCACACAC-3’ | 5’-GAGGTGTTTCCAACATTGGCTCA-3’ |
| ATG12 | 5’-TAGAGCGAACACGAACCATCC-3’ | 5’-CACTGCCAAAACACTCATAGAGA-3’ |
| ATG7 | 5’-CTGCCAGCTCGCTTAACATTG-3’ | 5’-CTTGTTGAGGAGTACAGGGTTTT-3’ |
| LC3A | 5’-CCAGCAAAATCCCGGTGAT-3’ | 5’-TGGTCCGGGACCAAAAACT-3’ |
| LC3B | 5’-ACCATGCCGTCGGAGAAG-3’ | 5’-GGTTGGATGCTGCTCTCGAA-3’ |
| LIPA | 5’-CCCACGTTTGCACTCATGTC-3’ | 5’-CCCAGTCAAAGGCTTGAAACTT-3’ |
| ATGL | 5’-GTGTCAGACGGCGAGAATG-3’ | 5’-TGGAGGGAGGGAGGGATG-3’ |
| HSL | 5’-GCGGATCACACAGAACCTGGAC-3’ | 5’-AGCAGGCGGCTTACCCTCAC-3’ |
| 18S | 5’-AGTTAGCATGCCAGAGTCTCG-3’ | 5’-TGCATGGCCGTTCTTAGTTG-3’ |
